# Supplementary material for: The Adaptive Evolution in the Fall Armyworm Spodoptera frugiperda (Lepidoptera: Noctuidae) Revealed by the Diversity of Larval Gut Bacteria
Source: MDPI journal article supplement (doi:10.3390/genes14020321), 2023-01-26
Supplement: s1 [file s1]

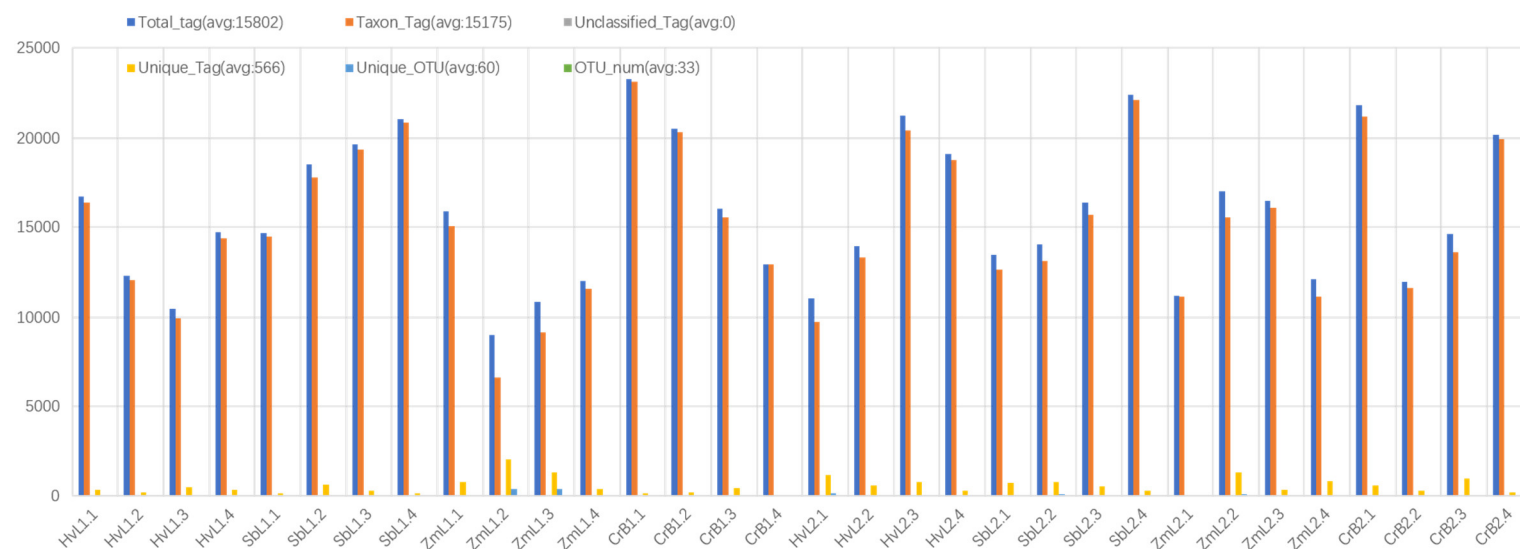

**Figure S1.** Statistics of valid tags and operational taxonomic unit (OTU) clustering of each sample.

**Table S1.** Statistics of valid tags and operational taxonomic unit (OTU) clustering of 5th instar larvae.

| Sample_Name | Total_Tag | Taxon_Tag | Unclassified_Tag | Unique_Tag | Unique_OTU | OTU_Num |
|-------------|-----------|-----------|------------------|------------|------------|---------|
| HvL1.1      | 16712     | 16341     | 0                | 366        | 5          | 9       |
| HvL1.2      | 12297     | 12046     | 0                | 224        | 27         | 20      |
| HvL1.3      | 10472     | 9942      | 0                | 522        | 8          | 9       |
| HvL1.4      | 14725     | 14372     | 0                | 343        | 10         | 15      |
| SbL1.1      | 14668     | 14490     | 0                | 164        | 14         | 28      |
| SbL1.2      | 18538     | 17827     | 0                | 630        | 81         | 45      |
| SbL1.3      | 19666     | 19343     | 0                | 300        | 23         | 21      |
| SbL1.4      | 21067     | 20865     | 0                | 189        | 13         | 19      |
| ZmL1.1      | 15895     | 15063     | 0                | 793        | 39         | 48      |
| ZmL1.2      | 9020      | 6592      | 0                | 2028       | 400        | 77      |
| ZmL1.3      | 10831     | 9139      | 0                | 1306       | 386        | 82      |
| ZmL1.4      | 12007     | 11554     | 0                | 425        | 28         | 41      |
| CrB1.1      | 23292     | 23128     | 0                | 153        | 11         | 22      |
| CrB1.2      | 20542     | 20320     | 0                | 209        | 13         | 24      |
| CrB1.3      | 16033     | 15528     | 0                | 474        | 31         | 32      |
| CrB1.4      | 12932     | 12924     | 0                | 4          | 4          | 6       |
| Total       | 248697    | 239474    | 0                | 8130       | 1093       | 498     |

**Table S2.** Statistics of valid tags and operational taxonomic unit (OTU) clustering of 6<sup>th</sup> instar larvae.

| Sample_Name | Total_Tag | Taxon_Tag | Unclassified_Tag | Unique_Tag | Unique_OTU | OTU_Num |
|-------------|-----------|-----------|------------------|------------|------------|---------|
| HvL2.1      | 11046     | 9715      | 0                | 1178       | 153        | 70      |
| HvL2.2      | 13924     | 13300     | 0                | 594        | 30         | 37      |
| HvL2.3      | 21263     | 20423     | 0                | 818        | 22         | 24      |
| HvL2.4      | 19133     | 18797     | 0                | 329        | 7          | 16      |
| SbL2.1      | 13452     | 12641     | 0                | 768        | 43         | 26      |
| SbL2.2      | 14028     | 13115     | 0                | 792        | 121        | 91      |
| SbL2.3      | 16365     | 15706     | 0                | 575        | 84         | 52      |
| SbL2.4      | 22426     | 22113     | 0                | 290        | 23         | 27      |
| ZmL2.1      | 11205     | 11154     | 0                | 46         | 5          | 17      |
| ZmL2.2      | 17006     | 15563     | 0                | 1306       | 137        | 42      |
| ZmL2.3      | 16464     | 16087     | 0                | 350        | 27         | 33      |
| ZmL2.4      | 12090     | 11153     | 0                | 849        | 88         | 37      |
| CrB2.1      | 21817     | 21200     | 0                | 593        | 24         | 25      |
| CrB2.2      | 11940     | 11614     | 0                | 312        | 14         | 21      |
| CrB2.3      | 14615     | 13592     | 0                | 973        | 50         | 31      |
| CrB2.4      | 20180     | 19961     | 0                | 215        | 4          | 13      |
| Total       | 256954    | 246134    | 0                | 9988       | 832        | 562     |

**Table S3.** Relative abundance of the most predominant taxa of gut bacteria in different treatment at the phylum level.

| <b>Taxonomy</b>       | <b>HvL1</b> | <b>SbL1</b> | <b>ZmL1</b> | <b>CrB1</b> | <b>Average</b> | <b>HvL2</b> | <b>SbL2</b> | <b>ZmL2</b> | <b>CrB2</b> | <b>Average</b> | <b>Tax_Detail</b>                   |
|-----------------------|-------------|-------------|-------------|-------------|----------------|-------------|-------------|-------------|-------------|----------------|-------------------------------------|
| Firmicutes            | 0.9991      | 0.8462      | 0.7386      | 0.5554      | 0.7848         | 0.8612      | 0.8692      | 0.9376      | 0.9623      | 0.9076         | k_Bacteria;p_Firmicutes;            |
| Proteobacteria        | 0.0007      | 0.1422      | 0.2274      | 0.4404      | 0.2027         | 0.1187      | 0.1113      | 0.0446      | 0.0284      | 0.0757         | k_Bacteria;p_Proteobacteria;        |
| Bacteroidetes         | 0           | 0.0005      | 0.0028      | 0.0004      | 0.0009         | 0.0183      | 0.0051      | 0.0029      | 0.0003      | 0.0066         | k_Bacteria;p_Bacteroidetes;         |
| Actinobacteria        | 0.0002      | 0.0108      | 0.0232      | 0.0035      | 0.0094         | 0.0018      | 0.0144      | 0.0148      | 0.009       | 0.01           | k_Bacteria;p_Actinobacteria;        |
| Cyanobacteria         | 0           | 0           | 0.0038      | 0           | 0.001          | 0           | 0           | 0           | 0           | 0              | k_Bacteria;p_Cyanobacteria;         |
| Acidobacteria         | 0           | 0           | 0.0007      | 0           | 0.0002         | 0           | 0           | 0           | 0           | 0              | k_Bacteria;p_Acidobacteria;         |
| Verrucomicrobia       | 0           | 0.0002      | 0           | 0           | 0.0001         | 0           | 0           | 0           | 0           | 0              | k_Bacteria;p_Verrucomicrobia;       |
| unidentified_Bacteria | 0           | 0.0001      | 0.0002      | 0.0003      | 0.0001         | 0.0001      | 0           | 0.0002      | 0           | 0.0001         | k_Bacteria;p_unidentified_Bacteria; |
| Chloroflexi           | 0           | 0           | 0           | 0           | 0              | 0           | 0           | 0           | 0           | 0              | k_Bacteria;p_Chloroflexi;           |
| Others                | 0           | 0           | 0.0034      | 0           | 0.0008         | 0           | 0           | 0           | 0           | 0              | Others                              |

**Table S4.** Relative abundance of the most predominant taxa of gut bacteria in different treatment at the genus level.

| Taxonomy                 | HvL1   | SbL1   | ZmL1   | CrB1   | Avg.   | HvL2   | SbL2   | ZmL2   | CrB2   | Avg.   | Tax_Detail                                                                                                               |
|--------------------------|--------|--------|--------|--------|--------|--------|--------|--------|--------|--------|--------------------------------------------------------------------------------------------------------------------------|
| <i>Enterococcus</i>      | 0.9989 | 0.8460 | 0.7384 | 0.5470 | 0.7826 | 0.8605 | 0.8661 | 0.9329 | 0.9623 | 0.9054 | k_Bacteria;p_Firmicutes;c_Bacilli;o_Lactobacillales;f_Enterococcaceae;g_Enterococcus;                                    |
| <i>Ralstonia</i>         | 0.0005 | 0.1236 | 0.0644 | 0.4333 | 0.1554 | 0.0154 | 0.0006 | 0.0003 | 0.0009 | 0.0043 | k_Bacteria;p_Proteobacteria;c_Gammaproteobacteria;o_unidentified_Gammaproteobacteria;f_Burkholderiaceae;g_Ralstonia;     |
| <i>Pseudochrobactrum</i> | 0.0000 | 0.0001 | 0.0657 | 0.0000 | 0.0164 | 0.0008 | 0.0001 | 0.0260 | 0.0003 | 0.0068 | k_Bacteria;p_Proteobacteria;c_Alphaproteobacteria;o_Rhizobiales;f_Rhizobiaceae;g_Pseudochrobactrum;                      |
| <i>Enterobacter</i>      | 0.0000 | 0.0003 | 0.0002 | 0.0002 | 0.0002 | 0.0471 | 0.0665 | 0.0001 | 0.0004 | 0.0285 | k_Bacteria;p_Proteobacteria;c_Gammaproteobacteria;o_Enterobacterales;f_Enterobacteriaceae;g_Enterobacter;                |
| <i>Klebsiella</i>        | 0.0000 | 0.0001 | 0.0000 | 0.0000 | 0.0000 | 0.0268 | 0.0378 | 0.0000 | 0.0003 | 0.0162 | k_Bacteria;p_Proteobacteria;c_Gammaproteobacteria;o_Enterobacterales;f_Enterobacteriaceae;g_Klebsiella;                  |
| <i>Ochrobactrum</i>      | 0.0000 | 0.0151 | 0.0306 | 0.0003 | 0.0115 | 0.0004 | 0.0024 | 0.0015 | 0.0188 | 0.0058 | k_Bacteria;p_Proteobacteria;c_Alphaproteobacteria;o_Rhizobiales;f_Rhizobiaceae;g_Ochrobactrum;                           |
| <i>Alcaligenes</i>       | 0.0000 | 0.0002 | 0.0086 | 0.0000 | 0.0022 | 0.0118 | 0.0003 | 0.0032 | 0.0010 | 0.0041 | k_Bacteria;p_Proteobacteria;c_Gammaproteobacteria;o_unidentified_Gammaproteobacteria;f_Burkholderiaceae;g_Alcaligenes;   |
| <i>Myroides</i>          | 0.0000 | 0.0000 | 0.0018 | 0.0000 | 0.0004 | 0.0102 | 0.0000 | 0.0008 | 0.0001 | 0.0028 | k_Bacteria;p_Bacteroidetes;c_Bacteroidia;o_Flavobacteriales;f_Flavobacteriaceae;g_Myroides;                              |
| <i>Achromobacter</i>     | 0.0000 | 0.0000 | 0.0086 | 0.0000 | 0.0021 | 0.0001 | 0.0001 | 0.0001 | 0.0009 | 0.0003 | k_Bacteria;p_Proteobacteria;c_Gammaproteobacteria;o_unidentified_Gammaproteobacteria;f_Burkholderiaceae;g_Achromobacter; |

**Table S5.** Alpha diversity indices of gut bacterial communities in different treatment.

| <b>group</b> | <b>observed_species</b> | <b>shannon</b> | <b>simpson</b> | <b>chao1</b> | <b>goods_coverage</b> | <b>PD_whole_tree</b> |
|--------------|-------------------------|----------------|----------------|--------------|-----------------------|----------------------|
| CrB1         | 16                      | 0.882          | 0.306          | 21.208       | 0.999                 | 3.042                |
| CrB2         | 24                      | 1.351          | 0.484          | 31.179       | 0.999                 | 2.579                |
| HvL1         | 8                       | 0.899          | 0.387          | 11.45        | 1                     | 1.12                 |
| HvL2         | 27                      | 1.645          | 0.554          | 33.156       | 0.999                 | 2.673                |
| SbL1         | 24                      | 1.152          | 0.403          | 29.936       | 0.999                 | 2.962                |
| SbL2         | 40                      | 1.685          | 0.588          | 60.073       | 0.998                 | 4.845                |
| ZmL1         | 52                      | 2.153          | 0.654          | 108.34       | 0.997                 | 4.724                |
| ZmL2         | 24                      | 1.14           | 0.399          | 27.844       | 0.999                 | 2.998                |
